# Supplementary material
Source: PubMed Central journal article supplement (PMC2663997)
Supplement: 0810875106_0810875106SI.pdf [file 0810875106_0810875106SI.pdf]

# Supporting Information

Roark et al. 10.1073/pnas.0810875106

Table S1. Summary of sample information, outer and inner radiocarbon ages, calibrated median probabilities ages from the Calib 5.0 program, calculated life-spans, and radial growth rates for *Gerardia* sp. and *Leioipoathes* sp.

| Sample ID                          | Location                 | Outer >>> |                     |       |                     | >>> Inner |                     |    |                 | Radial Growth rate mm/yr |           |                  |
|------------------------------------|--------------------------|-----------|---------------------|-------|---------------------|-----------|---------------------|----|-----------------|--------------------------|-----------|------------------|
|                                    |                          | Dist (mm) | <sup>14</sup> C Age | ±     | Median Prob Age     | Dist (mm) | <sup>14</sup> C Age | ±  | Median Prob Age |                          | Life Span | Radial Dist (mm) |
| <i>Gerardia</i> sp.                |                          |           |                     |       |                     |           |                     |    |                 |                          |           |                  |
| KP04 Ger 22                        | Keahole Point, Big Is HI | 0.0       | 4,070               | 35    | 4,147               | 30.0      | 4,780               | 35 | 5,101           | 954                      | 30.0      | 0.031            |
| KP04 Ger 24                        | Keahole Point, Big Is HI | 0.0       | 2,520               | 35    | 2,223               | 30.0      | 3,220               | 40 | 3,076           | 853                      | 30.0      | 0.035            |
| KP04 Ger 23 BD                     | Keahole Point, Big Is HI | 0.0       | 2,315               | 35    | 1,961               | 10.0      | 2,565               | 35 | 2,272           | 311                      | 10.0      | 0.032            |
| KP04 Ger 25                        | Keahole Point, Big Is HI | 0.0       | 2,205               | 35    | 1,836               | 28.0      | 2,860               | 35 | 2,674           | 838                      | 28.0      | 0.033            |
| KP04 Ger 21 D3                     | Keahole Point, Big Is HI | 0.0       | 2,460               | 35    | 2,151               | 24.0      | 3,115               | 40 | 2,927           | 776                      | 24.0      | 0.031            |
| KP04 Ger 20 D3                     | Keahole Point, Big Is HI | 2.0       | 3,970               | 35    | 4,006               | 23.0      | 4,555               | 35 | 4,806           | 800                      | 21.0      | 0.026            |
| GER-HI-RG-01†                      | Hawaii Big Is HI         | 0.0       | 2,390               | 30    | 2,055               | 23.2      | 3,200               | 35 | 3,040           | 985                      | 23.2      | 0.024            |
| Lan04 Ger 4 D2                     | Lanikai, Oahu HI         | 0.0       | 3,395               | 35    | 3,302               | 42.0      | 4,775               | 30 | 5,092           | 1,790                    | 42.0      | 0.023            |
| Lan04 Ger 5 D23                    | Lanikai, Oahu HI         | 0.0       | 3,435               | 30    | 3,346               | 27.0      | 4,970               | 35 | 5,357           | 2,011                    | 27.0      | 0.013            |
| Lan04-GER2-#1 <sup>‡</sup>         | Lanikai, Oahu HI         | 0.0       | Modern              |       | 2004AD <sup>§</sup> | 11.0      | 585                 | 30 | 263             | 317                      | 11.0      | 0.035            |
| GER-RD97-01 Radial*†               | Makapuu, Oahu            | 0.0       | Modern              |       | 1997AD <sup>§</sup> | 12.0      | 1,200               | 25 | 760             | 807                      | 12.0      | 0.015            |
| Mak04 GER-#1†                      | Makapuu, Oahu            | 0.0       | 570                 | 25    | 260                 | 20.0      | 1,150               | 35 | 710             | 450                      | 20.0      | 0.044            |
| Mak04 GER-#2†                      | Makapuu, Oahu            | 0.0       | Modern              |       | 1962AD <sup>¶</sup> | 38.1      | 3,020               | 30 | 2,730           | 2,742                    | 38.1      | 0.014            |
| Mak04 GER-#4†                      | Makapuu, Oahu            | 0.0       | 980                 | 25    | 585                 | 35.9      | 2,120               | 30 | 1,740           | 1,155                    | 35.9      | 0.031            |
| CS04 Ger 6 D8                      | Cross Seamount           | 2.0       | 9,790               | 45    | 10,677              | 61.0      | 10,350              | 40 | 11,383          | 706                      | 59.0      | 0.084            |
| CS04 Ger 101 D1                    | Cross Seamount           | 0.0       | Modern              |       | 2004AD <sup>§</sup> | 10.0      | 1,270               | 30 | 843             | 897                      | 10.0      | 0.011            |
| CS04 Ger 2 D1                      | Cross Seamount           | 0.0       | 730                 | 35    | 400                 | 45.0      | 1,370               | 35 | 945             | 545                      | 45.0      | 0.083            |
| <i>Leioipoathes glaberina</i>      |                          |           |                     |       |                     |           |                     |    |                 |                          |           |                  |
| BC-RD97-05 (BC#5)-Radial*†         | Makapuu, Oahu            | 0.0       | 530                 | 40    | 1997 AD             | 11.6      | 2,600               | 35 | 2,320           | 2,367                    | 11.6      | 0.005            |
| outer 7.7 mm of growth             |                          |           | 530                 | 40    | 1997 AD             | 7.7       |                     |    | 1,912           | 1,959                    | 7.7       | 0.004            |
| 1 st 5.1 mm of growth              |                          |           |                     |       | 1,912               | 5.1       |                     |    | 2,314           | 402                      | 5.1       | 0.013            |
| Lan04 Leio 1 D1 Stalk <sup>‡</sup> | Lanikai, Oahu HI         | 0.0       | Modern              | 2,004 | 0                   | 1.9       | 4,105               | 40 | 4,197           | 4,251                    | 19.0      | 0.004            |
| Lan04 Leio 1 D1 Hoof               | Lanikai, Oahu HI         | 0.0       | 2,035               | 35    | 1,634               | 5.9       | 4,150               | 35 | 4,265           | 2,631                    | 5.9       | 0.002            |
| Lan04 Leio-2                       | Lanikai, Oahu HI         | 0.0       | Modern              | 2,004 | 0                   | 0.7       | 620                 | 35 | 295             | 349                      | 0.7       | 0.002            |

The Median Probability Age reported is derived from the radiocarbon calibrations which were done using a  $\Delta R$  of  $-28 \pm 4$  <sup>14</sup>C years [(Druffel ERM, et al. (2001) Changes of subtropical North Pacific radiocarbon and correlation with climate variability. *Radiocarbon* 43:15–25]Druffel et al. 2001), the CALIB 5.0 (Stuiver & Reimer 1993)[Stuiver M, Reimer PJ (1993) Extended <sup>14</sup>C database and revised CALIB V5.0 radiocarbon calibration program. *Radiocarbon* 35:215–230] computer calibration program and the marine04 calibration dataset (Hughen et al. 2004[Hughen KA, et al. (2004) Marine04 Marine radiocarbon age calibration, 26–0 ka BP. *Radiocarbon* 46:1059–1086]).

<sup>∞</sup>Microtomed (100- $\mu$ m intervals) specimens; see Figs. 2A and 3.

\*Radial transects from outer edge to center in  $\sim$ 0.5-mm increments; see Fig. 5.

<sup>‡</sup>Results published in Roark et al., 2006, MEPS Vol 327: p1–14.

<sup>§</sup>Sample was collected alive, thus the outer most age assigned is the collection year.

<sup>¶</sup>Post-bomb data are reflected by positive  $\Delta^{14}$ C values. AD years were determined by comparison with a Hawaiian surface water  $\Delta^{14}$ C time-series. See Fig. 2.
